# Supplementary material for: Cancer-Specific miRNAs Extracted from Tissue-Exudative Extracellular Vesicles in Ovarian Clear Cell Carcinoma
Source: MDPI journal article supplement (doi:10.3390/ijms232415715), 2022-12-11
Supplement: s1 [file s1]

Supplemental Table S1. Te-EVs and RNA concentration in Tissue-exudative samples.

| Sample                  | Protein concentrations of<br>isolated Te-EVs<br>(ng/nL) | RNA concentrations extracted from<br>isolated TE-EVs<br>(ng/μL) |
|-------------------------|---------------------------------------------------------|-----------------------------------------------------------------|
| Case 1 Cancer<br>region | 11.1                                                    | 27.9                                                            |
| Case 1 Normal<br>region | 14.3                                                    | 42.3                                                            |
| Case 2 Cancer<br>region | 13.4                                                    | 31.7                                                            |
| Case 2 Normal<br>region | 8.6                                                     | 23.4                                                            |
| Case 3 Cancer<br>region | 7.1                                                     | 695.8                                                           |
| Case 3 Normal<br>region | 5.0                                                     | 244.3                                                           |
| Case 4 Cancer<br>region | 6.3                                                     | 88.9                                                            |
| Case 4 Normal<br>region | 6.9                                                     | 67.7                                                            |

Te-EVs, tissue-exudative extracellular vesicles;

Supplemental Table S2. Serum EVs and RNA concentrations in Blood samples.

| Sample                    | Protein concentrations of<br>isolated serum EVs<br>(ng/nL) | RNA concentrations extracted from<br>isolated serum EVs<br>(ng/μL) |
|---------------------------|------------------------------------------------------------|--------------------------------------------------------------------|
| OCC Case 1 Before Surgery | 3.3                                                        | 4.1                                                                |
| OCC Case 1 After Surgery  | 4.8                                                        | 2.1                                                                |
| OCC Case 2 Before Surgery | 3.6                                                        | 2.5                                                                |
| OCC Case 2 After Surgery  | 4.2                                                        | 2.5                                                                |
| OCC Case 3 Before Surgery | 9.3                                                        | 4.0                                                                |
| OCC Case 3 After Surgery  | 3.8                                                        | 2.8                                                                |
| OCC Case 4 Before Surgery | 4.1                                                        | 2.9                                                                |
| OCC Case 4 After Surgery  | 2.9                                                        | 2.0                                                                |
| OCC Case 5 Before Surgery | 3.6                                                        | 2.1                                                                |
| OCC Case 5 After Surgery  | 3.8                                                        | 2.1                                                                |
| OCC Case 6 Before Surgery | 6.5                                                        | 2.2                                                                |
| OCC Case 6 After Surgery  | 4.3                                                        | 2.7                                                                |
| AEH Case 1 Before Surgery | 4.5                                                        | 2.8                                                                |
| AEH Case 1 After Surgery  | 4.1                                                        | 4.7                                                                |
| AEH Case 2 Before Surgery | 2.8                                                        | 2.0                                                                |
| AEH Case 2 After Surgery  | 4.6                                                        | 4.2                                                                |
| AEH Case 3 Before Surgery | 5.8                                                        | 2.5                                                                |
| AEH Case 3 After Surgery  | 4.6                                                        | 2.1                                                                |
| AEH Case 4 Before Surgery | 4.5                                                        | 2.5                                                                |
| AEH Case 4 After Surgery  | 3.9                                                        | 2.6                                                                |

EV, Extracellular Vesicle; OCC, Ovarian Clear Cell carcinomas; AEH, Atypical Endometrial Hyperplasia;

Supplemental Table S3. Thirty-seven miRNAs were predominantly found in resected tissues of clear cell ovarian cancer.

| ID       | Probe Set Name  | Transcript ID<br>(Array Design) | Log Ratio |
|----------|-----------------|---------------------------------|-----------|
| 20501036 | MIMAT0000617_st | hsa-miR-200c-3p                 | 8.469065  |
| 20501163 | MIMAT0000682_st | hsa-miR-200a-3p                 | 7.118238  |
| 20500556 | MIMAT0000318_st | hsa-miR-200b-3p                 | 7.099837  |
| 20500450 | MIMAT0000259_st | hsa-miR-182-5p                  | 6.108348  |
| 20500459 | MIMAT0000264_st | hsa-miR-203a                    | 5.970606  |
| 20500555 | MIMAT0004571_st | hsa-miR-200b-5p                 | 5.915134  |
| 20500452 | MIMAT0000261_st | hsa-miR-183-5p                  | 4.870087  |
| 20500748 | MIMAT0000432_st | hsa-miR-141-3p                  | 4.775663  |
| 20504572 | MIMAT0005797_st | hsa-miR-1301-3p                 | 4.716464  |
| 20504433 | MIMAT0003339_st | hsa-miR-421                     | 4.22219   |
| 20500162 | MIMAT0000087_st | hsa-miR-30a-5p                  | 4.074956  |
| 20500163 | MIMAT0000088_st | hsa-miR-30a-3p                  | 4.027858  |
| 20500141 | MIMAT0000076_st | hsa-miR-21-5p                   | 3.845076  |
| 20501162 | MIMAT0001620_st | hsa-miR-200a-5p                 | 3.820005  |
| 20500465 | MIMAT0000267_st | hsa-miR-210-3p                  | 3.353928  |
| 20504408 | MIMAT0003322_st | hsa-miR-652-3p                  | 3.207805  |
| 20501276 | MIMAT0000751_st | hsa-miR-330-3p                  | 3.02951   |
| 20518788 | MIMAT0018932_st | hsa-miR-378f                    | 2.74446   |
| 20502129 | MIMAT0003393_st | hsa-miR-425-5p                  | 2.737563  |
| 20501312 | MIMAT0000772_st | hsa-miR-345-5p                  | 2.62025   |
| 20501181 | MIMAT0000691_st | hsa-miR-130b-3p                 | 2.364236  |
| 20500453 | MIMAT0004560_st | hsa-miR-183-3p                  | 2.299574  |
| 20500173 | MIMAT0000093_st | hsa-miR-93-5p                   | 2.07324   |
| 20500196 | MIMAT0000104_st | hsa-miR-107                     | 1.979804  |
| 20518834 | MIMAT0018976_st | hsa-miR-4454                    | 1.933004  |
| 20500718 | MIMAT0000417_st | hsa-miR-15b-5p                  | 1.916491  |
| 20517675 | MIMAT0016847_st | hsa-miR-378c                    | 1.906211  |
| 20500423 | MIMAT0004550_st | hsa-miR-30c-2-3p                | 1.903362  |
| 20500191 | MIMAT0000101_st | hsa-miR-103a-3p                 | 1.84253   |
| 20525434 | MIMAT0027373_st | hsa-miR-6736-5p                 | 1.842042  |
| 20501237 | MIMAT0000728_st | hsa-miR-375                     | 1.842041  |
| 20518925 | MIMAT0019064_st | hsa-miR-4525                    | 1.468871  |
| 20500418 | MIMAT0000242_st | hsa-miR-129-5p                  | 1.337035  |
| 20509229 | MIMAT0026917_st | hsa-miR-1910-3p                 | 1.202884  |
| 20518843 | MIMAT0018985_st | hsa-miR-3135b                   | 1.201568  |
| 20500194 | MIMAT0000103_st | hsa-miR-106a-5p                 | 1.041396  |
| 20500130 | MIMAT0000070_st | hsa-miR-17-5p                   | 1.041211  |

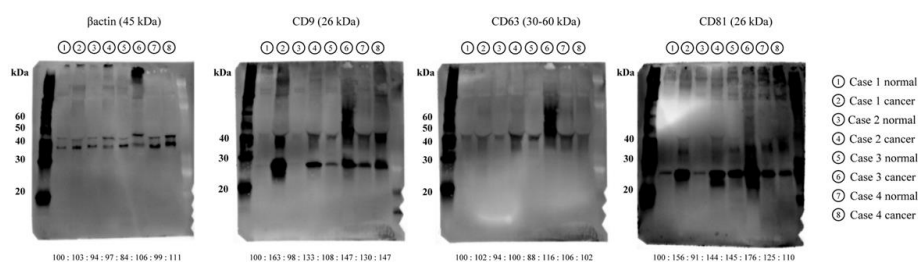

Figure S1. Western blot analysis was performed to all Te-EVs obtained from cancer and normal specimens in each case.
